# Supplementary material
Source: PubMed Central journal article supplement (PMC3979911)
Supplement: cc-13-749-s01.pdf [file cc-13-749-s01.pdf]

## **Supplemental Material to:**

**Edward Ratovitski**

**Phospho- $\Delta$ Np63 $\alpha$ /microRNA network modulates  
epigenetic regulatory enzymes in squamous cell  
carcinomas**

**Cell Cycle 2014; 13(5)**

**<http://dx.doi.org/10.4161/cc.27676>**

**<http://www.landesbioscience.com/journals/cc/article/27676>**

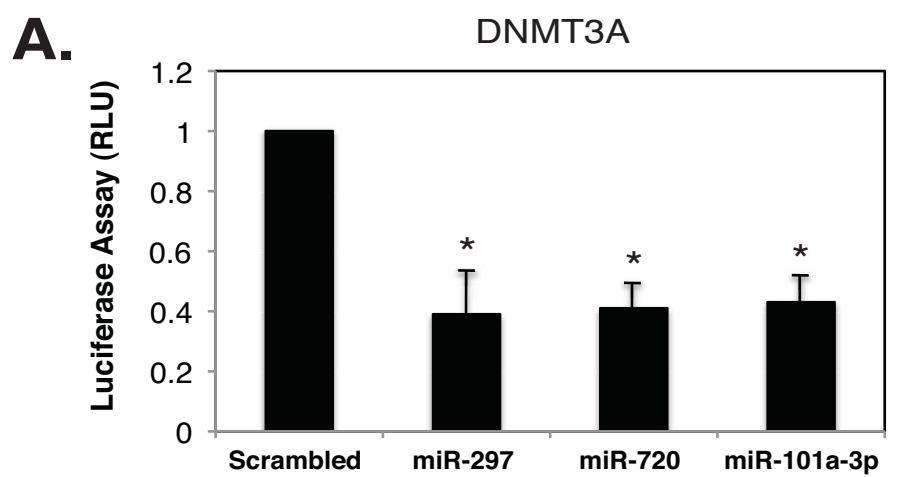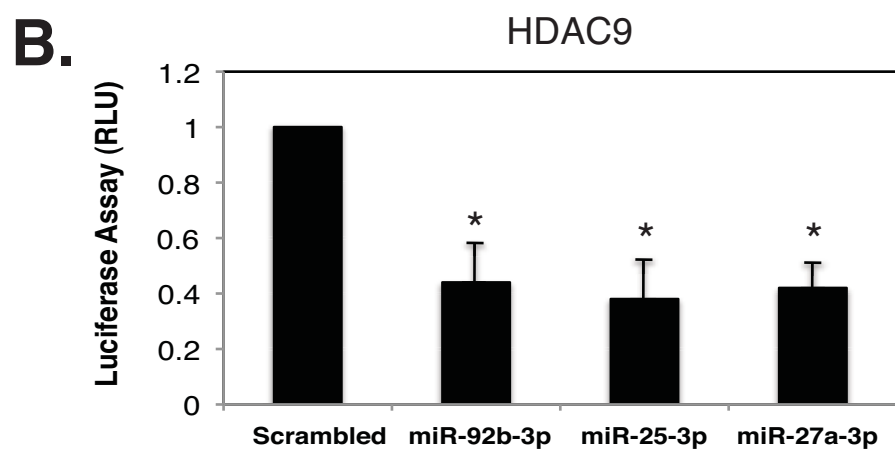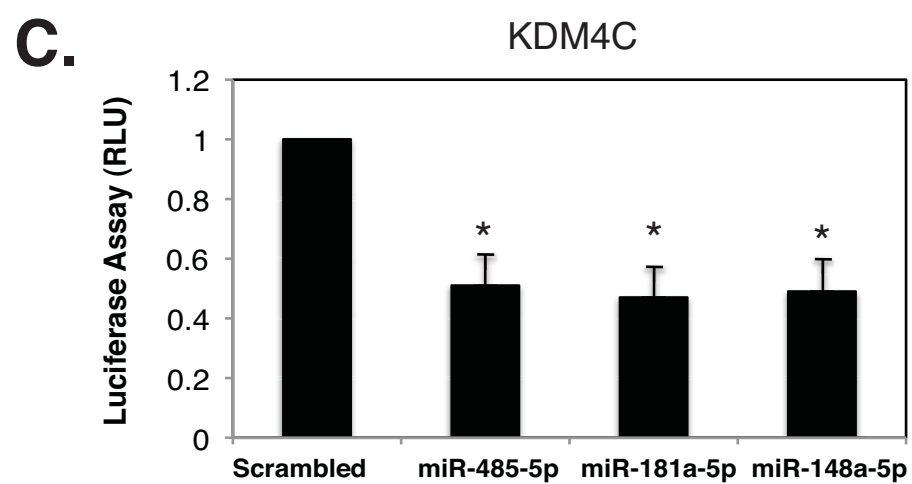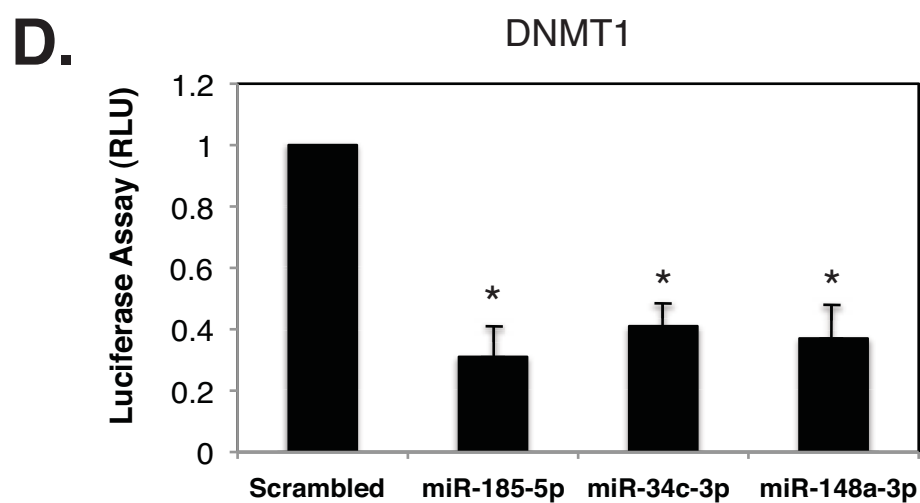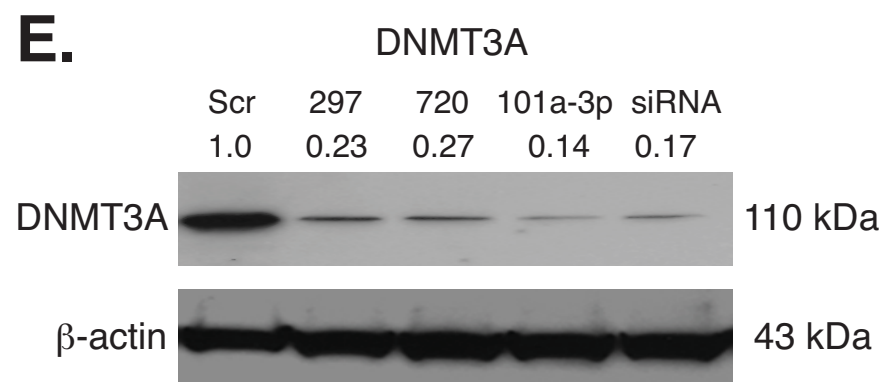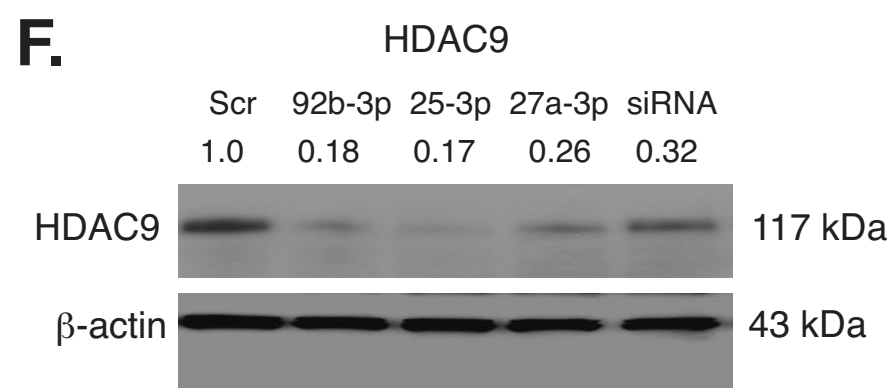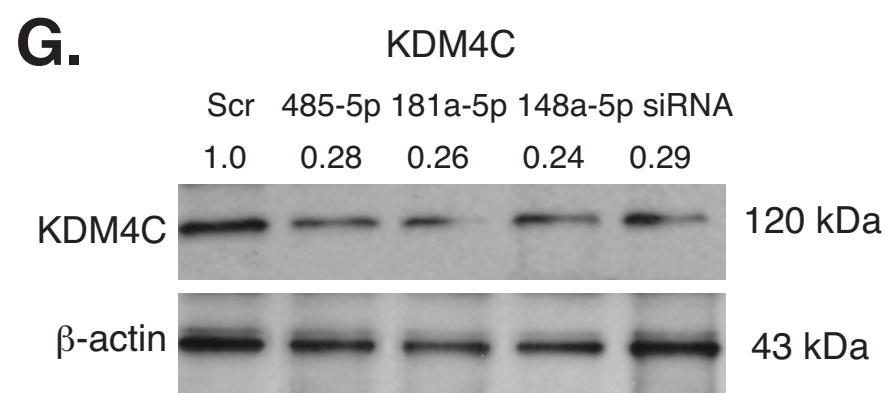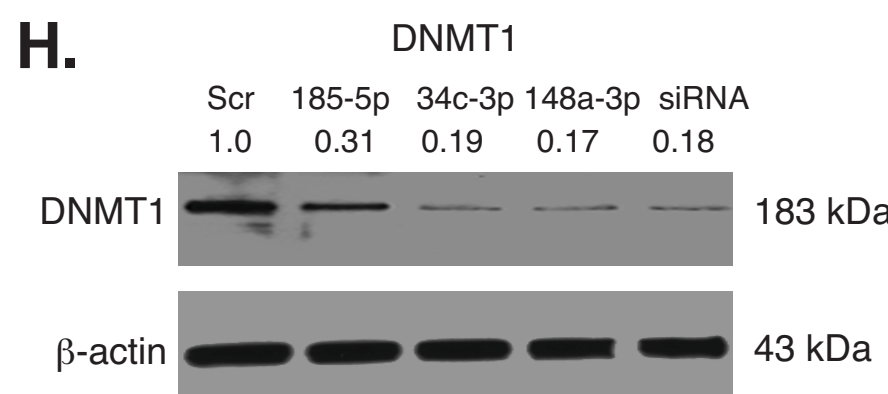

## Figure S2. DAPK1 promoter

-2000 TTAATAATAT ATTTTGTTTA ACCCAACGTA TCCAAAATAC TATCATTGGA  
-1950 AAGTGTAATG AATATAAAAA TATTCATGAG ATATTTTTTCA TTCTCATATC  
-1900 CATACTGTCT TGGACTCTAA TGTGTATTTT ACACCTTACAG CACAATTAAT  
-1850 TTGGGACTAG CTACATTTCA GCTCAACAAT AGCCAATAGC ATATGGGATA  
-1800 GCGCAAATAA ACTCTGCGTC TCTGTTGCTT CTTTGGGTCT CGGAGACCTC  
**DNMT3A**

-1750 AACCCTTTCT TCAGATTGCA AACCTTCTTG CCTTCAAGCC TCGGCTCCAA  
-1700 CACCAGTCCG GCAGAGGAAC CCAGTCTAAT GAGGTACGCT CCCTTCCTGC  
-1650 CAATCTCTAT TCCAATAACC TGTTTCGTGG TAAACGTAGG ACTGATCCTC  
**NF-Y** **NF-Y** **DNMT3A**

-1600 CAAAATTACC TTATTAATTA GCTTACATAT TTATTATCTA TCTGTCCAC  
-1550 CAGAATGCAG GTTTCCGGAA GGCAGGGATT TAAAAAATC TGTTTTGTTC  
**TP53/TP63**

-1500 TATGTGATTT TCCCATACCA AGCACCGTGC CGGCACAAG CTGGGATCCC  
**TP53/TP63**

-1450 AGTACACATCTCGGGACGGA AGAACCGTGT TTCCCTAGAA CCCAGTCAGA  
**DNMT3A**

-1400 GGGCAGCTTA GCAATGTGTC ACAGGTGGGG CGCCCGGTT CGGGCGGAC  
**TP63/DNMT3A**

-1350 GCACTGGCTC CCCGGCCGGC GTGGGTGTGG GGCGAGTGGG TGTGTGCGGG  
-1300 GTGTGCGCGG TAGAGCGCGC CAGCGAGCCC GGAGCGCGGA GCTGGGAGGA  
-1250 GCAGCGAGCG CCGCGCAGAA CCCGCGAGCG CGGCCTGGCA GGGCAGCTCG  
-1200 GAGGTGGGTG GGCCGCGCCG CCAGCCCGCT TGCAGGGTCC CCAATGGCCG  
**TP63/NF-Y**

-1150 CCTGCCGGCC GCCCTCCGCC CAAAAGGCGG CAAGGAGCCG AGAGGCTGCT  
-1100 TCGGAGTGTG AGGAGGACAG CCGGACCGAG CCAACGCCGG GGACTTTGTT  
-1050 CCCTCCGCGG AGGGGACTCG GCAACTCGCA GCGGCAGGGT CTGGGGCCGG  
**TP63**

-1000 CGCCTGGGAG GGATCTGCGC CCCCCACTCA CTCCCTAGCT GTGTTCCCCG  
-950 CGCCGCCCCG GCTAGTCTCC GGCCTGGCG CCTATGGTCG GCCTCCGACA  
-900 GCGCTCCGGA GGGACCGGGG GAGCTCCCAG GCGCCCGGT GAGTAGCCAG  
**TP53/TP63**

-850 GCGCGGCTCC CCGGTCCCCC CGACCCCGG CGCCAGCTTT TGCTTTCCCA  
-800 GCCAGGGCGC GGTGGGGTTT GTCCGGGCG TGCCTCGAGC AACTGGGAAG  
-750 GCCAAGGCGG AGGGAAACTT GGCTTCGGGG AGAAGTGCGA TCGCAGCCGG  
-700 GAGGCTTCCC CAGCCCCGCG GGCCGGGTGA GAACAGGTGG CGCCGGCCCG  
-650 ACCAGGCGCT TTGTGTGCGG GCGCGAGGAT CTGGAGCGAA CTGCTGCGCC  
-600 TCGGTGGGCG GCTCCCTTCC CTCCCTTGCT CCCCCGGGCG GCCGCACGCC  
-550 GGGTCGGCCG GGTAACGGAG AGGAGTCCG CAGGAATGTG GCTCTGGGGA  
-500 CTGCCTCGCT CGGGGAAGGG GAGAGGGTGG CCACGGTGTG AGGAGAGGCG  
-450 CGGGAGCCGA GAGGTGGCGC GGGGGTGCCA CCGTTGCCGC AGGCTGGAGA  
-400 GAGATTGCTC CCAGTGAGGC GCGTACCGTC TGGGCGAGGG CTTCATTCTT  
-350 CCGCGGCGTC CCTGGAGGTG GGAAAGCTGG GTGGGCATGT GTGCAGAGAA  
-300 AGGGGAGGCG GGGAGGCCAG TCACTTCCGG AGCCGGTTCT GATCCCAACA  
-250 GACCGCCAG CGTTTGGGGA CGCCGACCTC GGGGTGCCGT GGTGCCCGGC  
-200 CCCACGCGCG CGCGGGGCTG AGGGGTCGGG GGCGTCCCTG GCCGCCAGC  
-150 TTTAACAAAG GGTGCTCCTC TCCACCCCGC GAGGAGGGGC AGCTCCGGAG  
-100 ACCCGGTCTT CAGCGAGCGG GGTCTTAGCG CCGGGGAGGT CTACTTCCTT  
-50 TTGGGGTTGC CATTTTACTA TTATTATTGC CTTTTTTTTT TCTTCAAAAG

**Figure S3. SMARCA2 (BRM) promoter**

```
-2000 TATCTGGCTA TATTATTAGT TGCGACTTAT TAGGCAGTTA GAAGTTAGTA
-1950 TTTATGTTAC ACTTTTACTA TACTACTAGT CTTGTTTTAAA ATTTCTCCCT
-1900 ATATATTTCT CAGTTAATAG TTATACCGGC ATATCCTCAG GCAGAAAAAC
-1850 AAGTTCTTAC AATGGATCCT TCAGGGCACA CTATATTCTA TTTCTCTTAG
-1800 CTGTGTTATC TTTTCGTTGTC TTGAGGTTCA CTTCAAGATA GACAGAAAAT
-1750 GATGAAGCTA AAGTTAACAA GCAAGTAGCA AGACCTTAGA AAGCTATAGG
-1700 GTGGGTGATC ACCAACACTC CCAGCCATCA TGAAAATGCT GCCCTAGTGG
-1650 GCTCTGCTTC AGCCAGCAGT GGACCAGTGA TATAAAGAAT TCTTGCTTCT
-1600 TAATGACTAC ATGGCAGTAT TTGGCGTTCT TTCCATTACT TCTTGTCTTC
-1550 AACTTATCCA GCCTGAAGTT TTAAGCATCC TAGAACTGCA TTTTCAGACCC
-1500 AGTTGCTCAA ATGGAGTCAA TTTTGCAACA GTAAAATGGT CTTAAAATAG
-1450 GATTTTACTC TAGGGGAAG AATCCTCAAC CAGATAGTCA CAGTGCACCT
-1400 TGAATGACTA ATTTAAGCCA TTACATTACG AAATAAGGGA TAAATCATAc
-1350 TTTTCATAAC ACTACTGCAT AGGAACAGTT TTAAGAGTCA AGCATCTACA
-1300 TTAATCTGAG TCTAAAATAA TAGGCCCTG ATTTAAAGTC TCCTAACATT
-1250 CTTTCACACT TCATAAACT AAAAATAAAA TTGTCTCACC AAACACCGAC
-1200 CTATTGGTCC GGCCAAAGTA CTGTATTTCA AGGAAAATTG GAGCAAAGAG
-1150 GTCTCAAAAC CGCGACTTGC CAGCAAATTA CAATTTGCAG CCTTAATTGG
-1100 TCTCAAATGC GGGGTGAGAG GGAAGAGACT ACGGTCTGTA GAAAATAAGA
-1050 GATTTATTCC CTTTTTTAAA TCAAACCAG ATTCCATGCT TCAGCCGCC
-1000 CCTAACCCGC CAGCCCCGCC CCCAGGGTTT GTTTTTCCAT ATTTTTGTAT
-950 ATATTTTAGC GAAGATGGCA GGTGAGGGAA GGTTATAGTG CTGTACCTAG
-900 TCCACGAAGT AAACAGAGAG GTTAGGGTGG GTTTACTTAT TTATAAGGCG
-850 TTCAGCCTCT CAGCTGTTT TCCCTCGTTG GCATTTGGAA GCTTGCAGTC
-800 CTTCAGGGAA GAGACAGATT TGGCAGGAAC GTTCTTTGTG CCCGCCTCCC

      TP53/TP63
-750 TTTTCTATTT TTTATTTTTT TACCTGGAAT AGGGGGCAGA TTTATAATGA
-700 CAGCCTTAGG GAAGGGGGAG AAAAAGTTTC AGCCGGCACG ACAATGCCCG
-650 TTTTTTCCAC AGTCCACACT GTGCCACAAA CAGCTTTGGT GCCACTCGGA
-600 GCCCGTCCCC CGTCCCCTCC CTCTCTCTCT GCAGGCTCGC ACTGGCAGGC

      TP53/TP63
-550 GGAGGCACAG TTAAATTCCA GCACCTTCTC CACATACCCG CGAACTACTA
-500 CGCGCTATTA CTACGGCTGC CCTCCGTTTT CGCTTCGCCT CCTCCCCTTC
-450 CGCAGTCTCC CTGGAGGAGC CCCGCGGCGC CCGAGGAAGA GGACTGCCAG
-400 GGAAGGGACA GCGGGCGCCC AGCTCCAGCA GGGCTTGGGG CTTTCTGCAT
-350 CCCGCGCAGT TTCTCTGCTC CAGGCACAAA CGCGGCCCGA GAGCCGGCGC
-300 CTTGCAGTCA CACACGGATC CACGCATACA GTAGAGCTGT CTAGATCCAC
-250 ATTCTTGCAC ACCGCCCCCT CCTCCCCCGG CGCTCCCAGG GTCGCTGAGC
-200 TGAGCGAGTG ACAGGCGCGT CCCGCCAACC CGCGCCCGGA CGGGCAGGGA
-150 GGAGCGGCGC GCGGGGCCAA CTGCGGCGCG TCTTCCGGCG CCCGCGGAGG
-100 AGGCGAGGGT GGGACGCTGG GCGGAGCCCG AGTTTAGGAA GAGGAGGGGA
-50 CGGCTGTCAT CAATGAAGTC ATATTCAT AATCTAGTCCTC TCTCCCTCTG
```

## Figure S4. MDM2 promoter

-2000 TGCAAGTCAA ACGGATTTAT TTATTGTATC TCAAACAGTC CTCTTATATT  
 -1950 TTCCTTTCTG TATTTTTTTGA TAATTTTCTT GTGCCTGGAA TATTCTCTGC  
 -1900 TTTTATTTTAA GTCTCACCAT CTTTCAAGAC ACAAATATG TGTGATCTCT  
 -1850 GAGGCCTTTG TGAAGTGCCT CCAGCATTTA CTAAGCAATT AATTCTGTCT  
 -1800 CTGAACCTTTT ATAGCACAAA CCCATTCGTT CACTTGATAT TTAACAAATA  
 -1750 TCAACCTCTA TCACCTTATCT CTTTTTTTTT TTTTTTCTTC TGAGATGGAG  
 -1700 TCTTGCTCTG TCACCCAGGC TGGACTGCAG TGGCGCGATC TCCGCTCACT  
 -1650 GCAACCTCTG CCTCCCGAGA TCAAGCGATT CTTCTGCCTC AGCCTCCCAA  
 -1600 GTGGCTAGGA TTACAGGCGC CCGCCACGGG GCCCGGCTAA TTTTTGTATT  
 -1550 TTTAGTAGAG ACAAGGTTTC ACCATCTTGG CCAGGCTGGT CTCGAACTCC  
 -1500 TAACCTCGTG ATCCACCCAC CTCAGCCTCC CAAAGTGCTG GGATTACAAG  
 -1450 CGTGAGCCAC CGTGCGCAGC CTATCACTTA TCTTTTCATG CTTACATTTT  
 -1400 CTCACTGCTT GAGATTTTCT TTCATCCAGG GTCAAGCACT GAGTCTATTA  
 -1350 GAAACCCAC TGTATATGAT CTGATGAAGA TGAGATTATC TTTTTAAAAG  
 -1300 CCACATATTA AATCTCTTAA GTTAATAATA TTGGCAATCA ACTTAAATCA  
 -1250 ACTGAGTGAC CACTATGTTT AAGGAAGTTT CCTTTCTGGT AGGCTGGGAA  
 -1200 GCGGGAGAAG GGAAGGATAT AACTTTATAA AAAAAAAAAA GCTGCAGAAG  
 -1150 GGAAGGATAT AACTTTATAA AAAAAGGTCC TTGTTCAACA GGAGCTAATC  
 -1100 ACTTACTGGC CAGAGAAGAA ACGTGTTTCT TCTTTGCAAT GGCTGTGTTT  
 -1050 TTGGGTTTAG CTAACCTCAAT TCTTTATGTC CTCAATTTAT GAGACCGCAT  
 -1000 CAAAAACGTT TTTGCCACAT CTCTGTGGGA AAGTAGGTGA GTCAGAATGA  
 -950 GTGCATAATA TATAAGTATA TATTTTAATG ATAATGAATG TGTAGATTA  
 -900 CAAACCCAAA CTTTGTTTTT GTTTTTTTGA GAGTCTTGCC CTGTCGCC **CA**  
 -850 **GGCTGGAGTG CAATGGCATG** ATCTTGGCTC ACTGCAGCCT CTGCCTCCCG  
     **TP53**  
 -800 GGTTCACAGG **ATTGTCCTG**C CTCAGCCTCC GGAGTAGAGT AGCTGGGATT  
     **TP63**  
 -750 ACAGGTGACC GCCACCACGC CCGACTAATT TTTGTAGTTT TTAGTAGAGA  
 -700 CGGCGTTTCC CATGTTGGCC AGGTTGGTCT TGAACCTCTG ACCTCAAGTG  
 -650 ATCCACCCGC CTCGGCCTAC CCAAAGTGAT GGGATTACAA GCGTGAGCCA  
 -600 CCGCGCCCAG CCAAACCCAA ACATTCTAAA AGCGCAGAGT AACCGCTCCC  
 -550 CTCCCGCCA ACGGTAACCA GCATCTTCGT TCTCCAACCA GAACAGCTGT  
 -500 ATGCACCGGT GTATAAGCCT GCCTTAAGTG CTATTTTTTAA TCTTTTTTAA  
 -450 AAACAGGCCT TAAATAACT CATTTGGGTA CAACTCCAGC GGCTGGTGGA  
 -400 GTGGGCTTAA TATATTAAAC AGCTGTTAAT TTTGGTTTCT TTTTGGTAAC  
 -350 AGCGACACGG AGATCCGCAT TTGTGCGAGT TTCCACCGCG GCGGGGAAGT  
 -300 GTAAACACAA GAAATACAAA CATAGCGCAA CGGCTAAAGG AGTGTCACAG  
 -250 CGCCAAACCT TGCTGGCTCC GCGCCAGGCC GAGCCCCACC CTCTCAGCTC  
 -200 GCGGCCAACCA CCCCCACCC GCCTCACAGC CCGCCGCGCC CGCGGGGCGA  
 -150 CACCCCCAC TCCATCATCC CGGAGGTGGT GCGGCCGAGC CCCGGACCCA  
 -100 ATTGGCGGAA GCGGGCCGG TTGTGTGCGC GCGCACAAAT GCCCGGATGC  
 -50 GCCGCGACGA CCCGCGCGCT CCCCTCGGGC GGTAGGGGGC GCGCACCGAG

A.

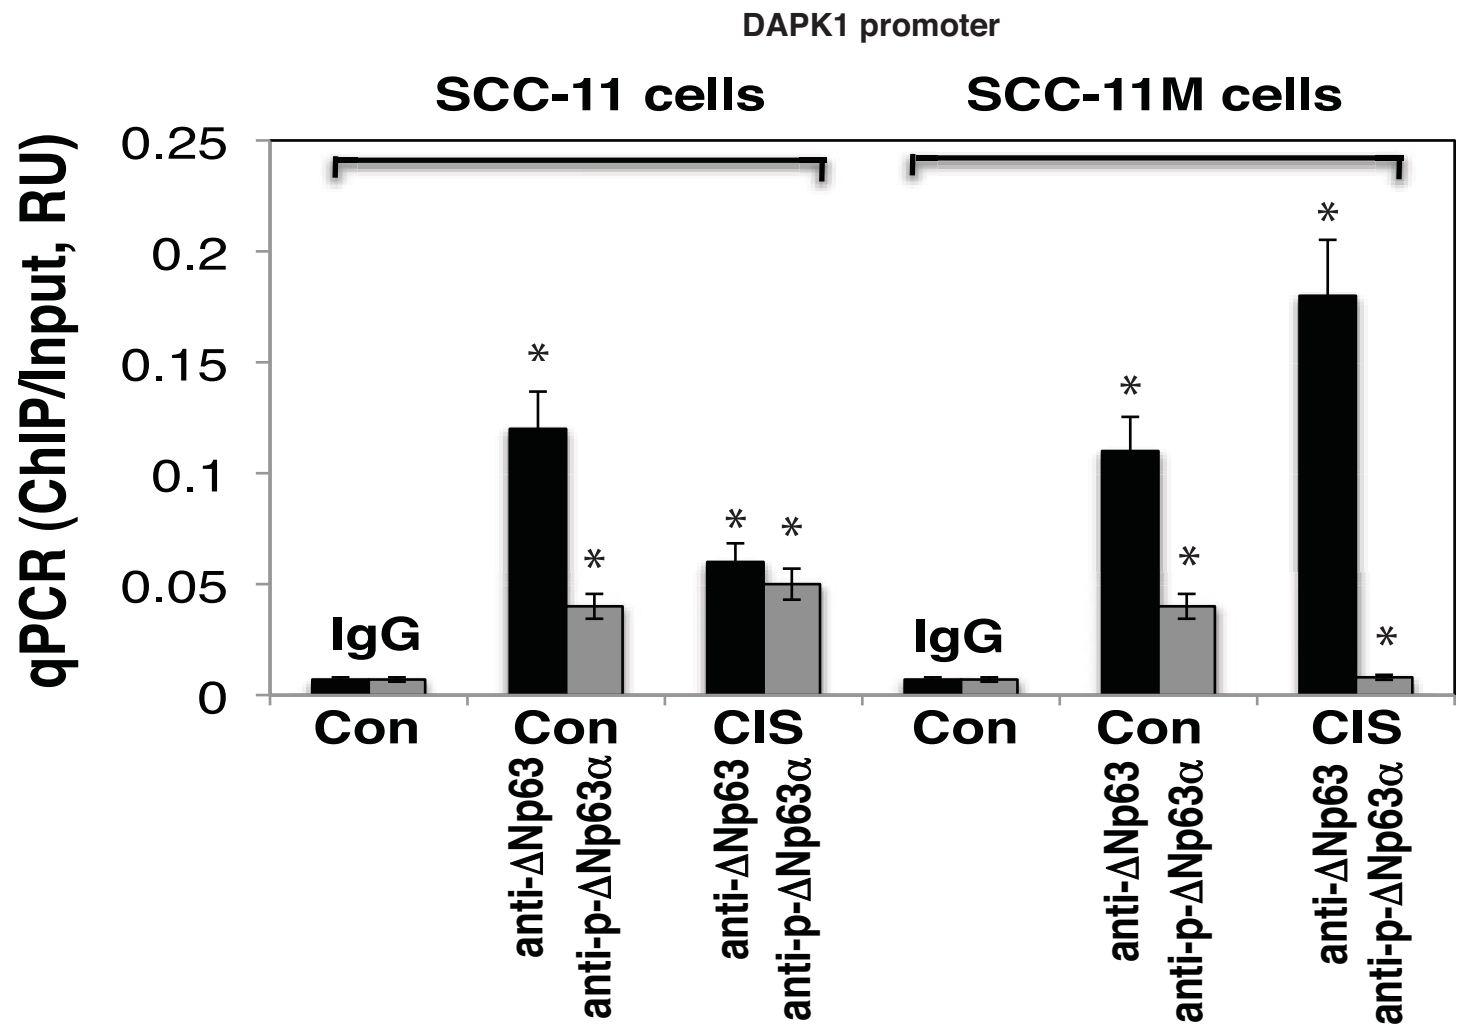

B.

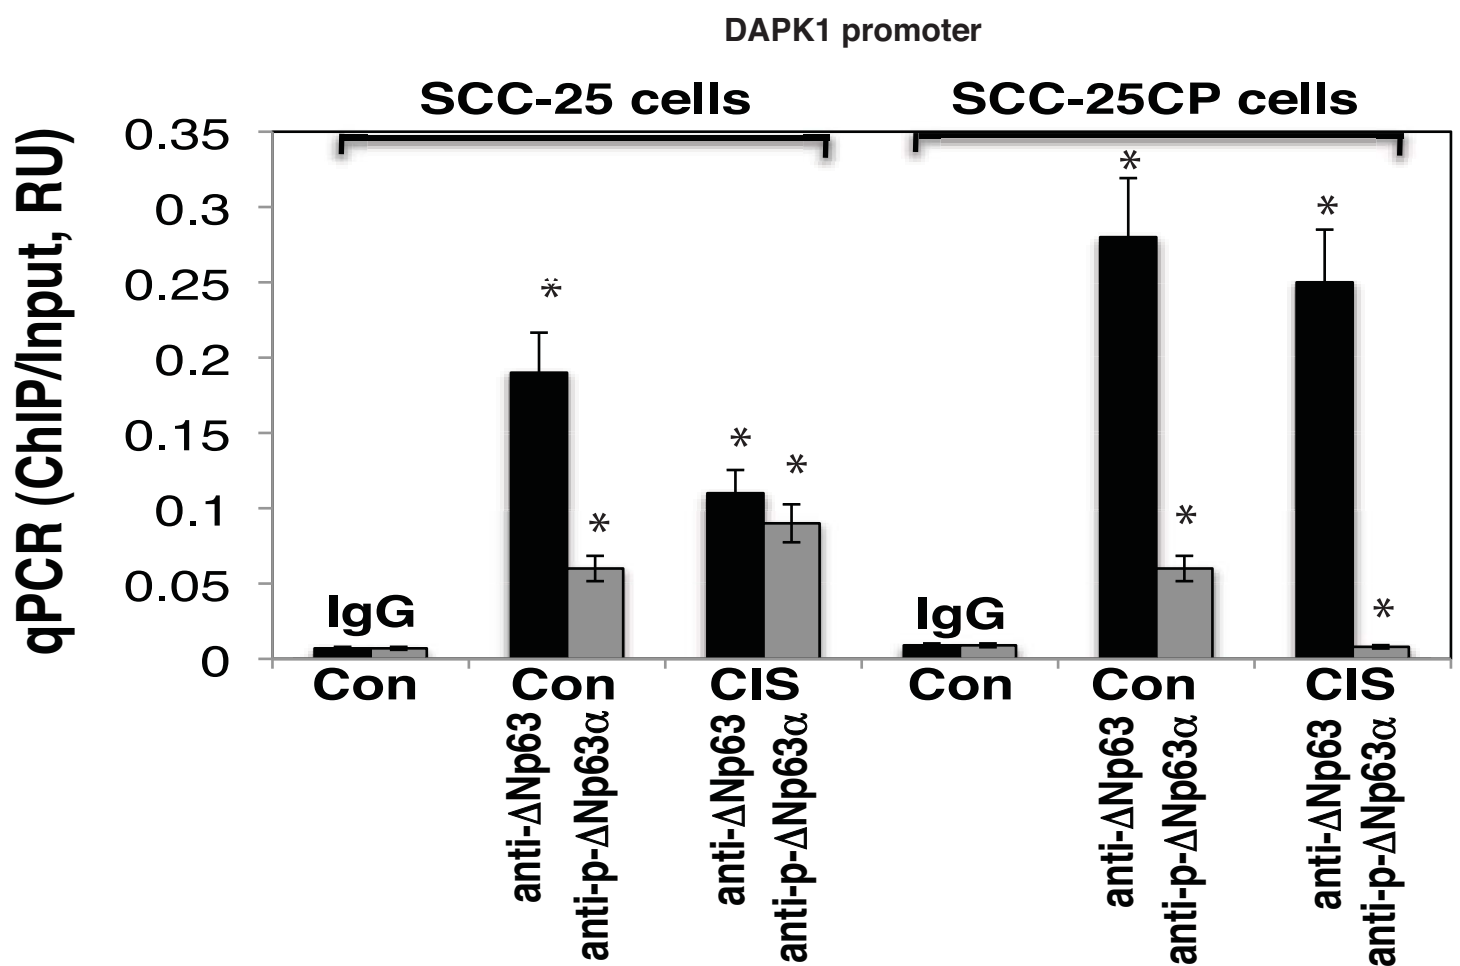

A.

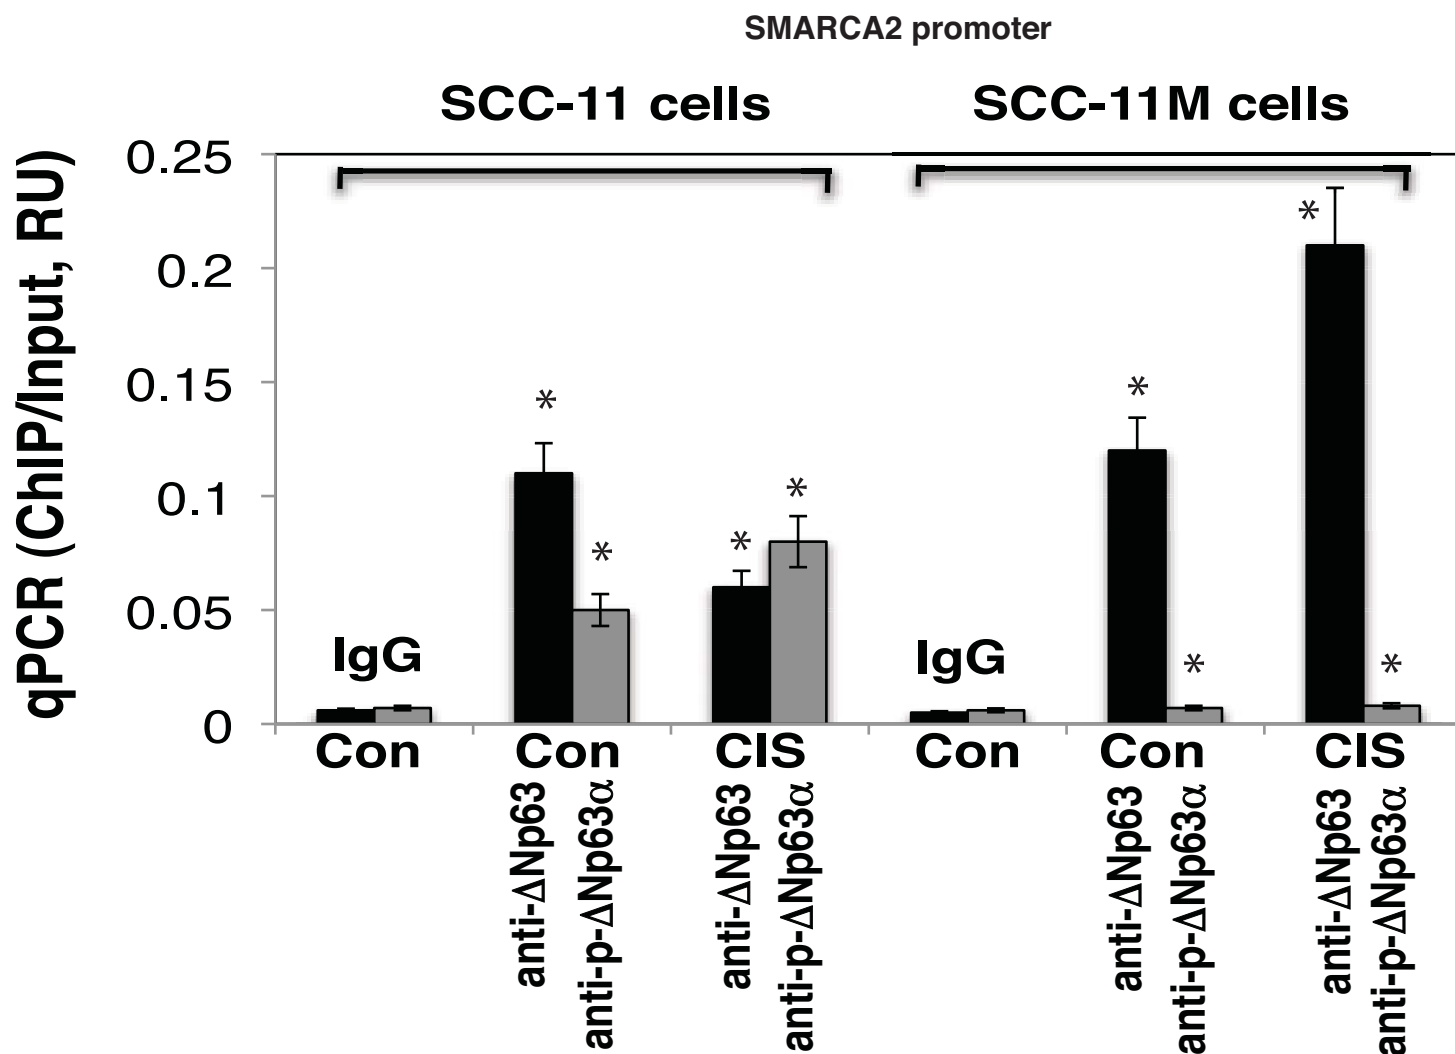

B.

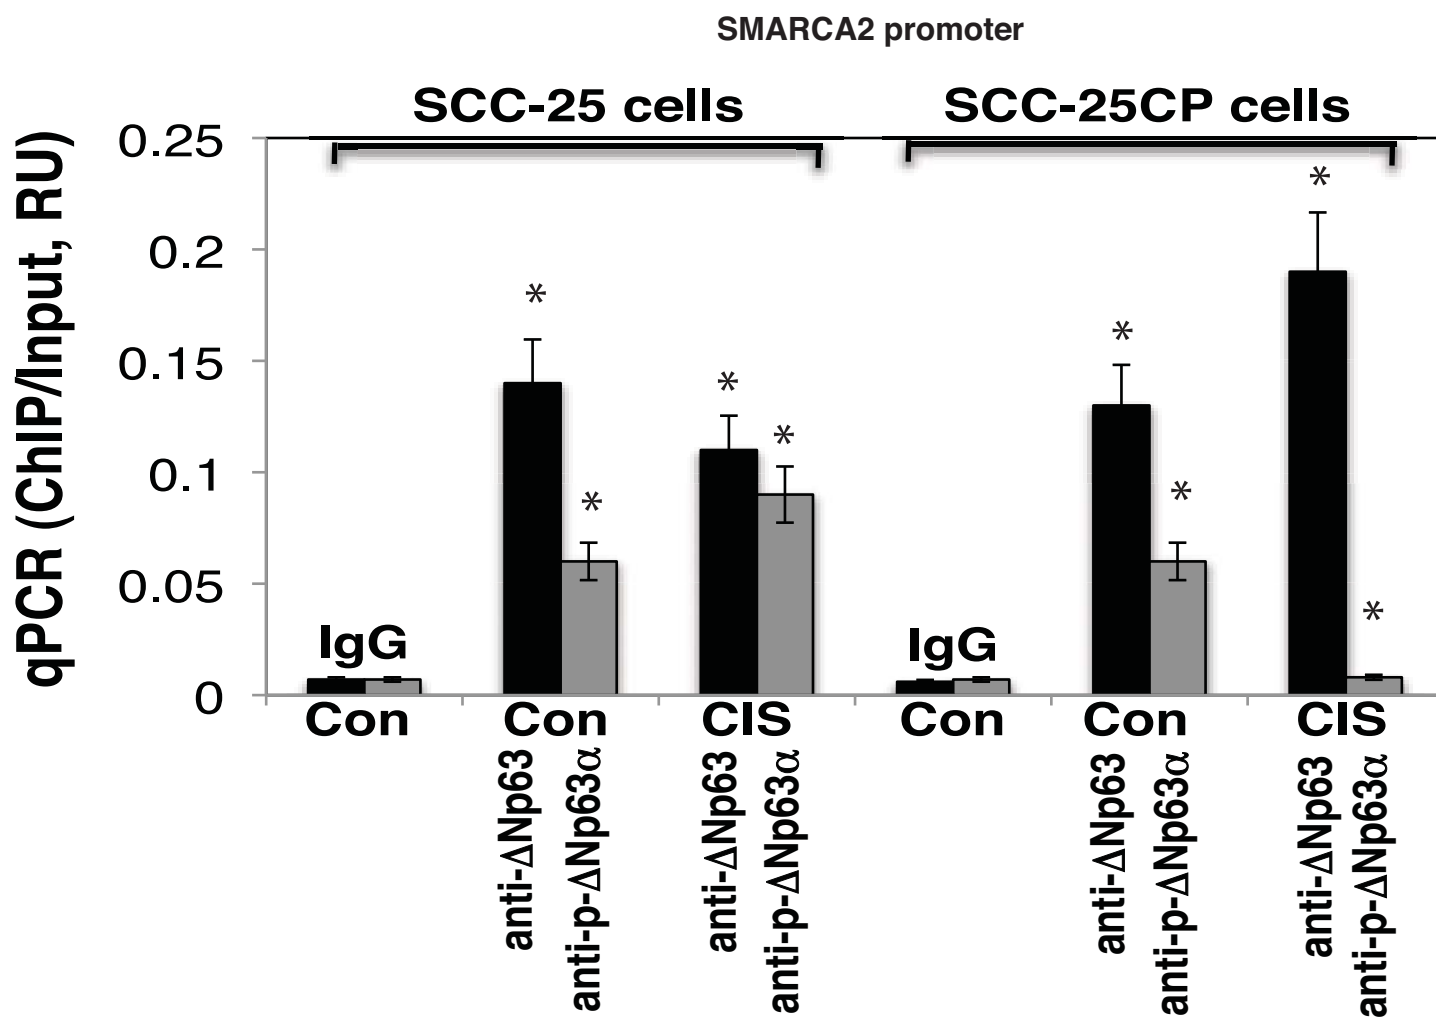

A.

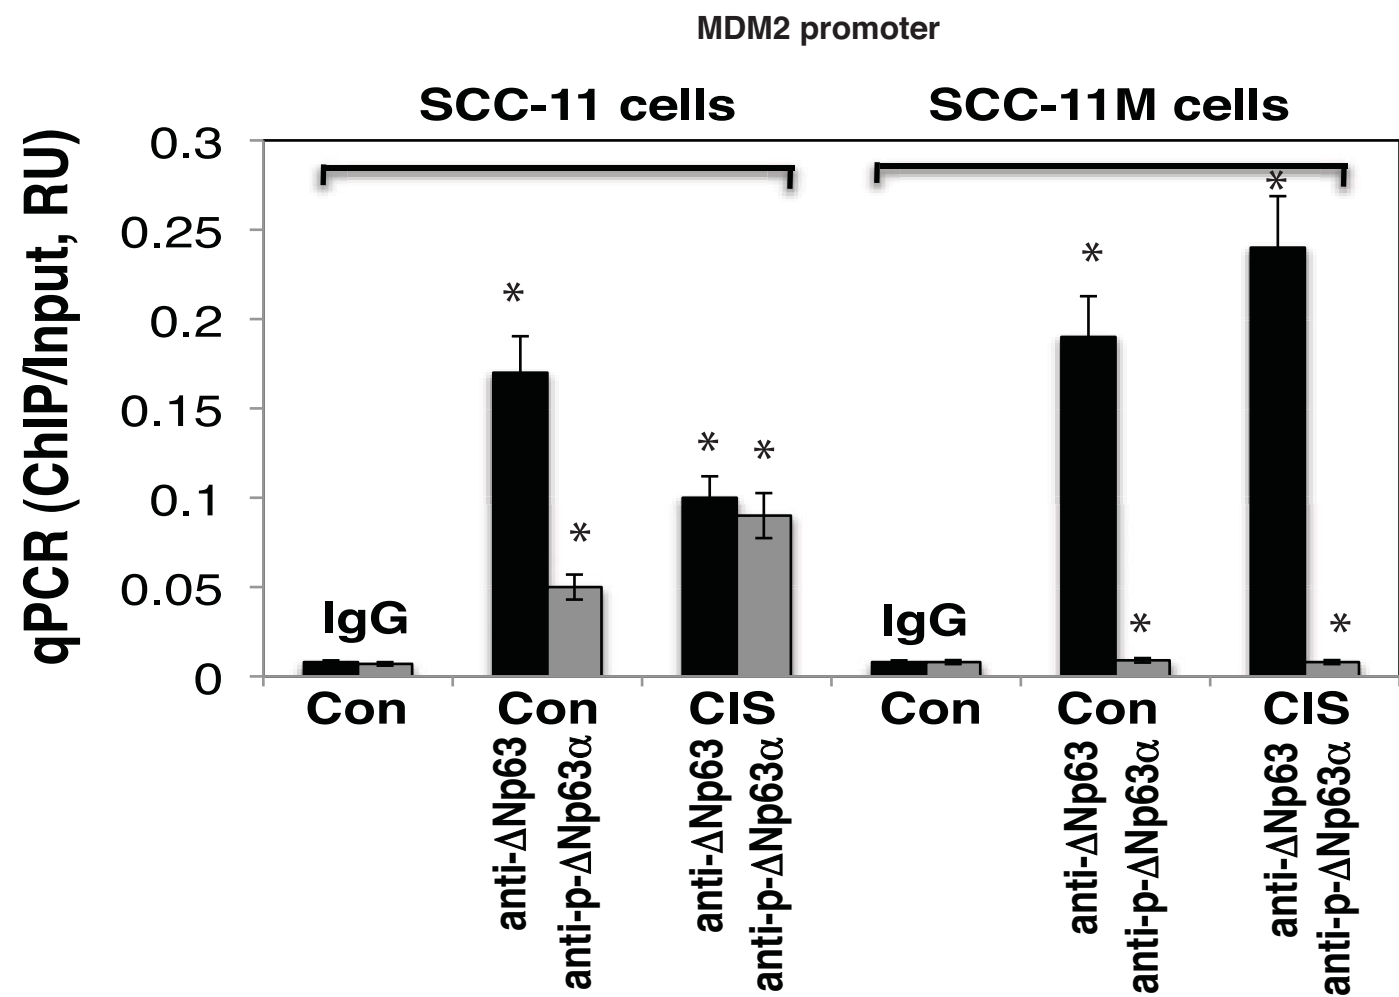

B.

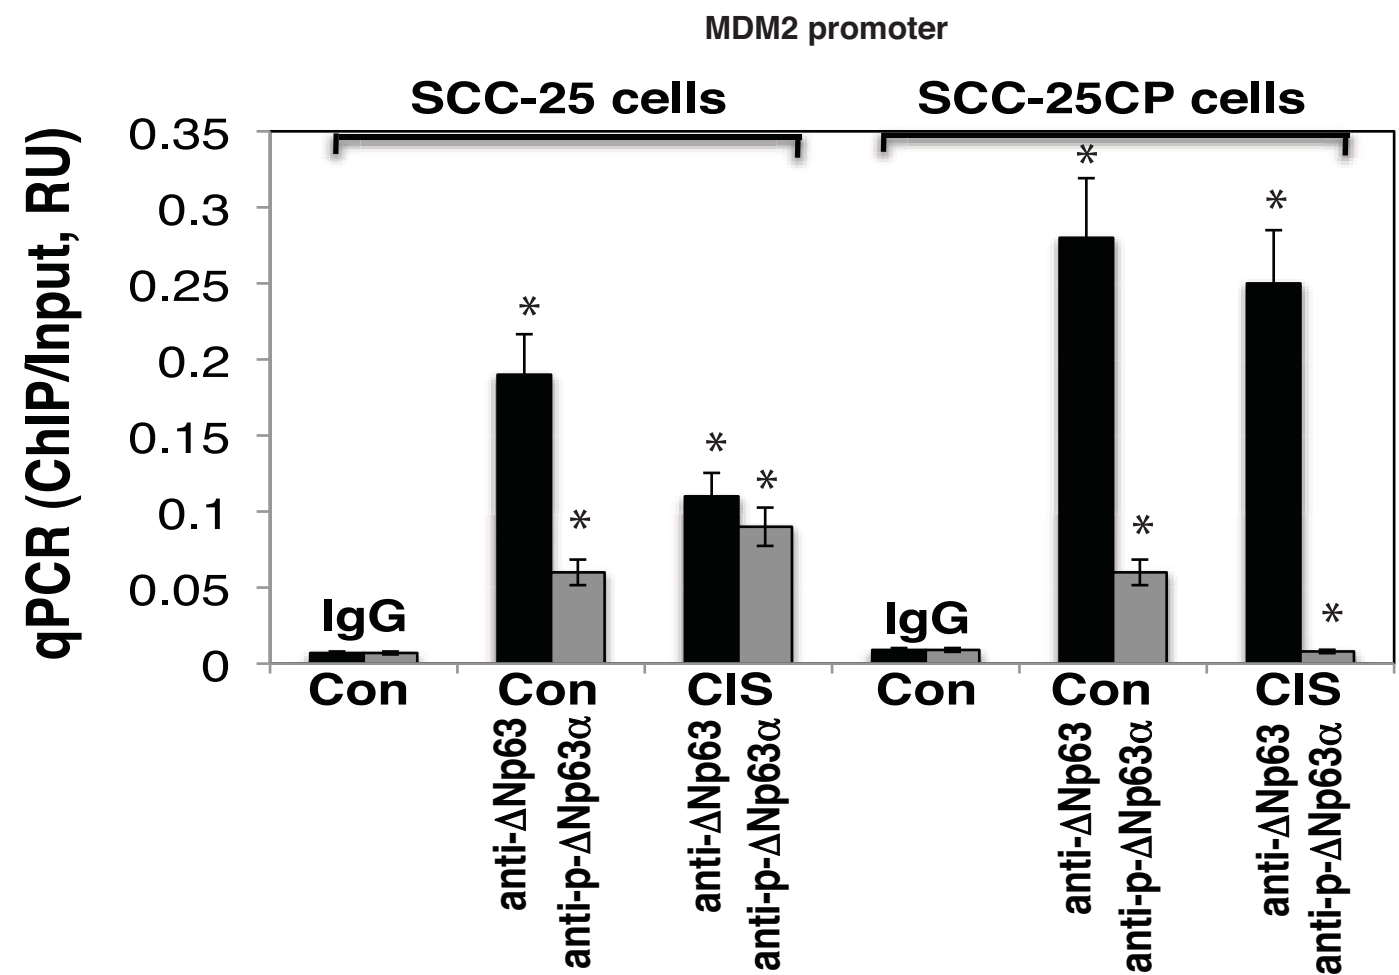



**A.** DAPK promoter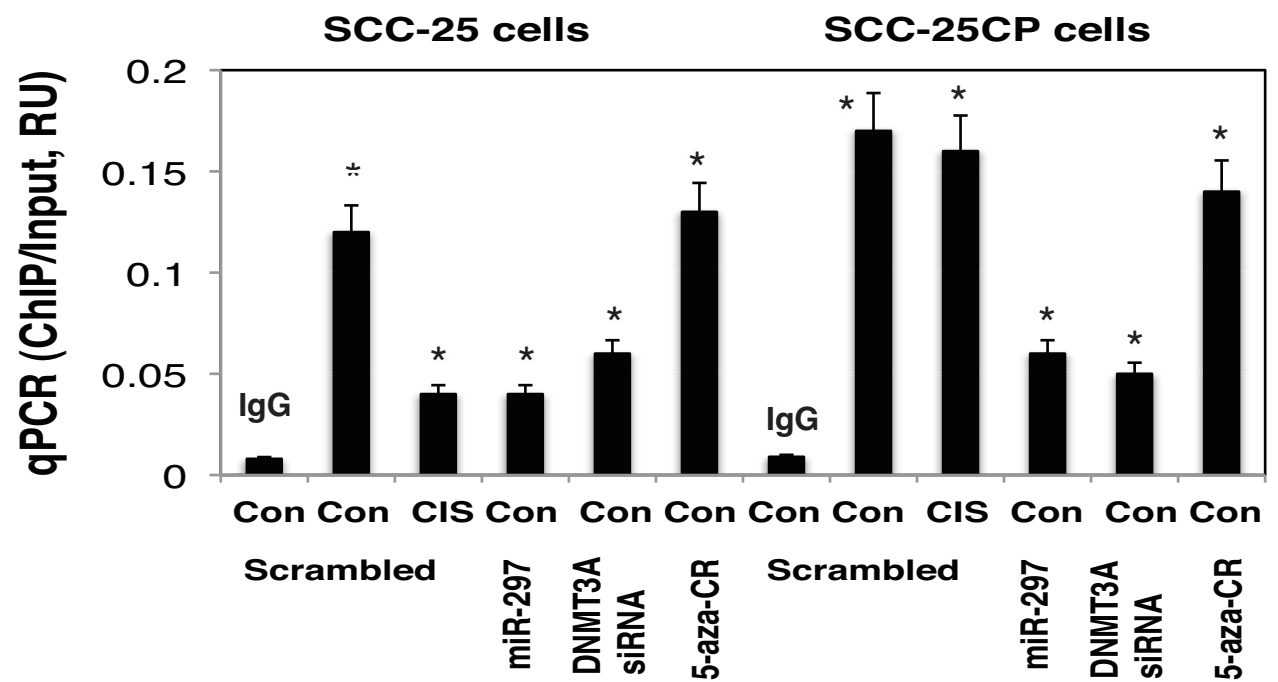**B.** SMARCA2 promoter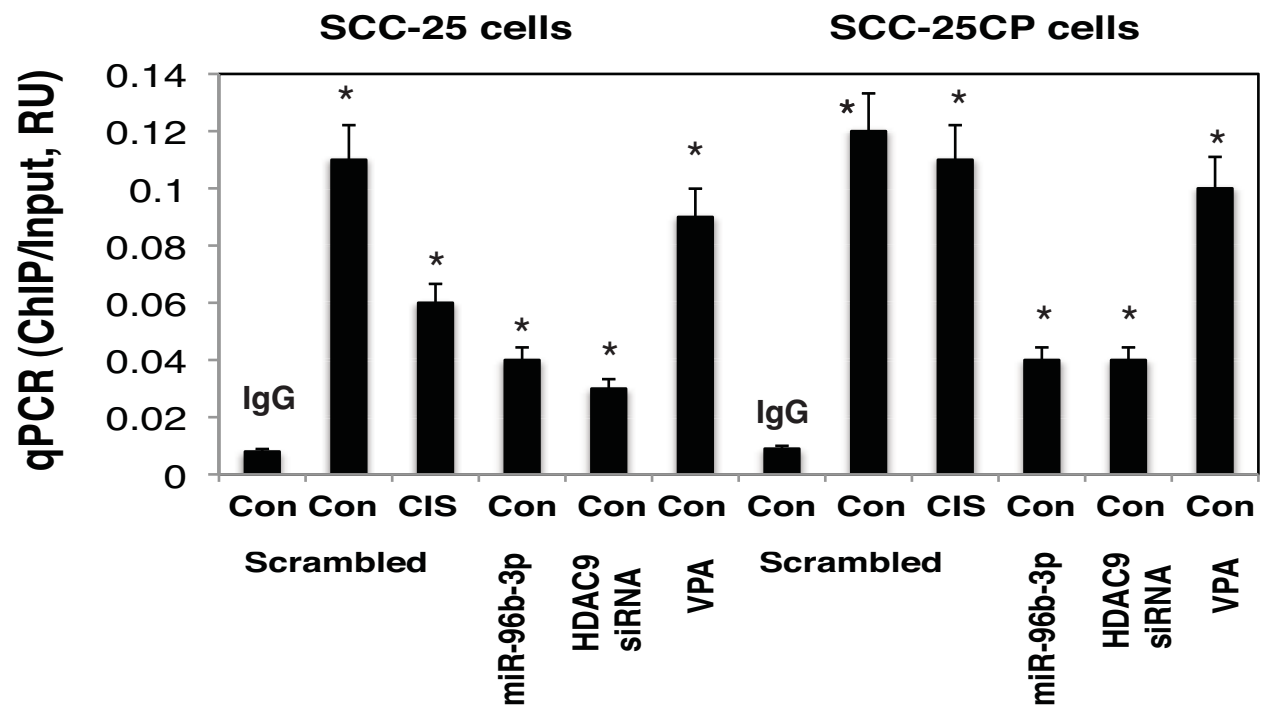**C.** MDM2 promoter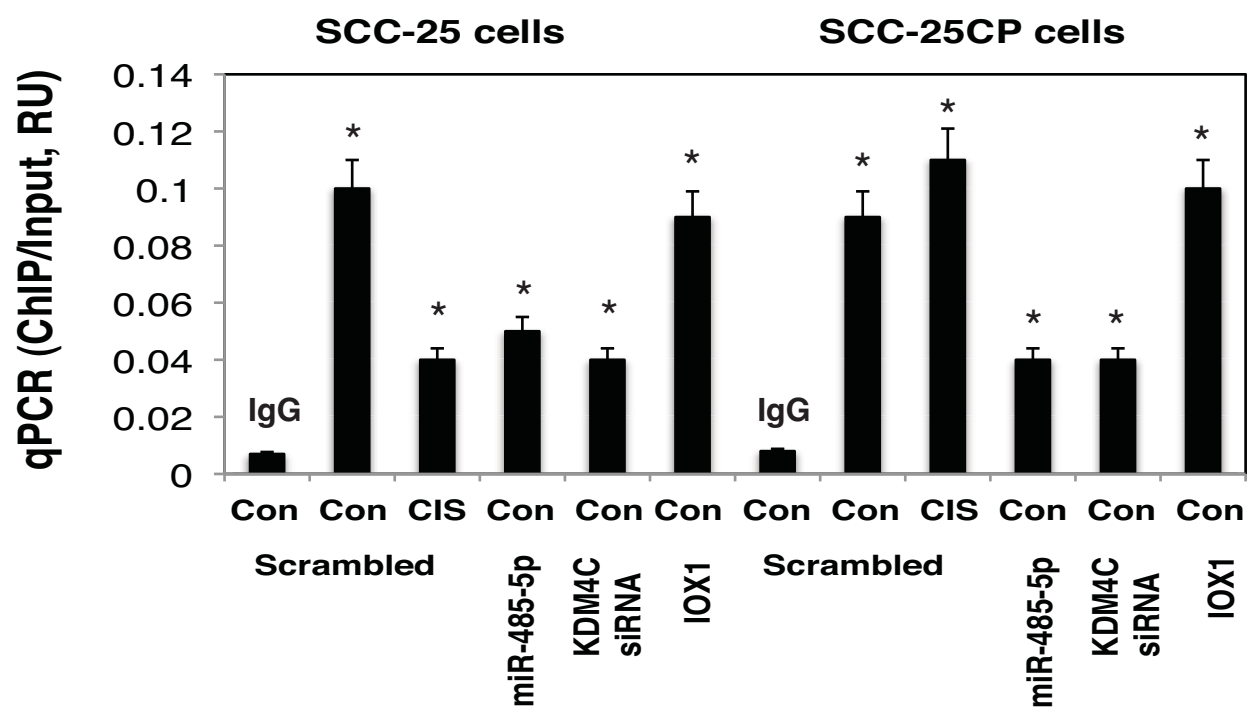

Figure S9

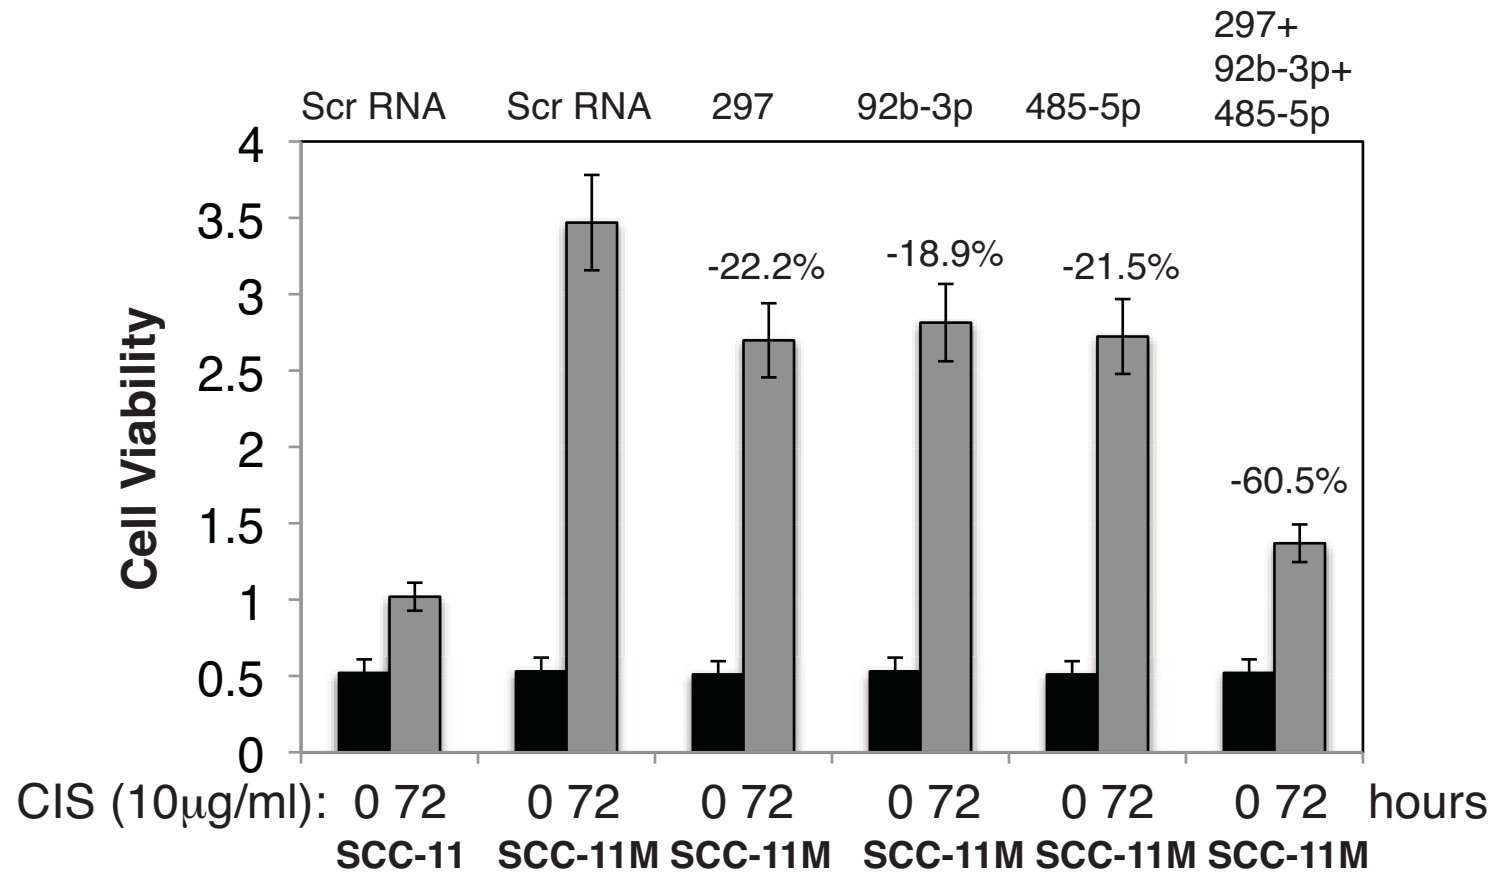

## Supplemental Figure Legends:

**Figure S1. Tested microRNAs and siRNAs modulate their protein targets.** (A and E). SCC-11 cells were transfected with the scrambled RNA (#4464058), miR-297 (MC10176), miR-720 (MC13574) and miR-101a-3p (MC11414) mimics along with the pLight\_Switch DNMT3A plasmid (#S808608, SwitchGear Genomics). (B and F). SCC-11 cells were transfected with the scrambled RNA (#4464058), miR-92b-3p (MC10102), miR-25-3p (MC10584) and miR-27a-3p (MC10939) mimics along with the pLight\_Switch HDAC9 plasmid (#S811202, SwitchGear Genomics). (C and G). SCC-11 cells were transfected with the scrambled RNA (#4464058), miR-485-5p (MC10837), miR-181a-5p (MC10421) and miR-148a-5p (MC12683) mimics along with the pLight\_Switch KDM4C plasmid (#S806873, SwitchGear Genomics). (D and H). SCC-11 cells were transfected with the scrambled RNA (#4464058), miR-185-5p (MC12486), miR-34c-3p (MC12342) and miR-148a-3p (MC10263) mimics along with the pLight\_Switch DNMT1 plasmid (#S802002, SwitchGear Genomics). All microRNA mimics were obtained from Ambion/Life Technologies.  $5 \times 10^4$  cells/well in a 24-well plate were transfected with the control (empty) pLightSwitch\_3UTR vector (S890005, SwitchGear Genomics), respectively using Fugene HD reagent (Roche). Cells were also transfected with the selected 3'-UTR plasmids (listed in A-D) along with 100ng of the tested microRNA mimics, as well as with siRNAs [against DNMT3A (sc-37757), HDAC9 (sc-35550), and KDM4C (sc-92765) all obtained from Santa Cruz Biotechnology] for 48h. Renilla luciferase activity was measured at 480nm using a luminometer. Data obtained from the control samples were presented in relative units (RU) and designated as 1. Data were expressed as means  $\pm$  SD from three independent experiments in triplicate. (E-H). Immunoblotting analysis of expression of indicated proteins in SCC-11 cells. Antibodies used against  $\beta$ -actin (Sigma), DNMT1 (GTX30364m GenTex), DNMT3A (GTX30365, GenTex), HDAC9 (PA5-11246, Thermo Fisher Scientific), and KDM4C (A300-885A, Bethyl Laboratories). Blots were scanned and quantified by the Image Quant software version 3.3. Values

indicated above the blots were normalized for  $\beta$ -actin levels and expressed as a fold-change to a control sample defined as 1.

**Figures S2-S4. Schematic representation of the *DAPK1*, *SMARCA1* and *MDM2* promoters.**

Potential binding sites for the transcription factors (S2-S4) and DNMT3A (S2) are highlighted in bold, boxed and shadowed. Primer sequences for the ChIP specific regions are underlined.

**Figure S5. ChIP enrichment of the *DAPK1* promoter DNA in SCC cells upon cisplatin**

**exposure.** Chromatin was precipitated with 5 $\mu$ g of anti- $\Delta$ Np63 antibody (black) or with 5 $\mu$ g of anti-p- $\Delta$ Np63 $\alpha$  antibody (grey). (A). SCC-11 versus SCC-11M cells. (B). SCC-25 versus SCC-25CP cells. QPCR assay was performed using three independent experiments in triplicate (\*,  $p < 0.05$ ). The amount of ChIP-enriched DNA (ChIP/Input) represented as a signal relative to the total amount of chromatin DNA (Input) using the same primers, as described in Materials and Methods. Normal IgG was used as a negative control.

**Figure S6. ChIP enrichment of the *SMARCA2* promoter DNA in SCC cells upon cisplatin**

**exposure.** Chromatin was precipitated with 5 $\mu$ g of anti- $\Delta$ Np63 antibody (black) or with 5 $\mu$ g of anti-p- $\Delta$ Np63 $\alpha$  antibody (grey). (A). SCC-11 versus SCC-11M cells. (B). SCC-25 versus SCC-25CP cells. QPCR assay was performed using three independent experiments in triplicate (\*,  $p < 0.05$ ). The amount of ChIP-enriched DNA (ChIP/Input) represented as a signal relative to the total amount of chromatin DNA (Input) using the same primers, as described in Materials and Methods. Normal IgG was used as a negative control.

**Figure S7. ChIP enrichment of the *MDM2* promoter DNA in SCC cells upon cisplatin exposure.**

Chromatin was precipitated with 10 $\mu$ g of anti- $\Delta$ Np63 antibody (black) or with 10 $\mu$ g of anti-p-

$\Delta$ Np63 $\alpha$  antibody (grey). (A). SCC-11 versus SCC-11M cells. (B). SCC-25 versus SCC-25CP cells. QPCR assay was performed using three independent experiments in triplicate (\*,  $p < 0.05$ ). The amount of ChIP-enriched DNA (ChIP/Input) represented as a signal relative to the total amount of chromatin DNA (Input) using the same primers, as described in Materials and Methods. Normal IgG was used as a negative control.

**Figure S8. ChIP analysis of the *DAPK1*, *SMARCA1* and *MDM2* promoters in SCC-25 and SCC-25CP cells.** (A). ChIP-qPCR assay of the DNMT3A binding to the specific region of the *DAPK1* promoter. (B). ChIP-qPCR assay of the HDAC9 binding to the specific region of the *SMARCA2* promoter. (C). ChIP-qPCR assay of the KDM4C binding to the specific region of the *MDM2* promoter. QPCR assay was performed using three independent experiments in triplicate (\* indicates  $p < 0.05$ ). The amount of ChIP-enriched DNA (ChIP/Input) represented as a signal relative to the total amount of chromatin DNA (Input) using the same primers. The normal rabbit IgG was used as a negative control.

**Figure S9. microRNAs modulate the resistance of SCC-11M cells to cisplatin exposure.** Cell viability assay. SCC-11 cells and SCC-11M cells were transfected with the scrambled RNA (Scr RNA) for 32h, and then exposed to 10 $\mu$ g/ml cisplatin (CIS) for 0 and 72h. Cells were also transfected with indicated microRNA mimics (miR-297, B, miR-92b-3p, and C, miR-485-5p alone or in a combination thereof) for 32h, and then exposed to 10 $\mu$ g/ml cisplatin (CIS) for 0 and 72h. Cell viability (MTT assay) was monitored in triplicate in three independent experiments. Black bars are representative of 0h, while grey bars – of 72h of cisplatin treatment.
